# Supplementary material for: Long-term water use efficiency and non-structural carbohydrates of dominant tree species in response to nitrogen and water additions in a warm temperate forest
Source: Frontiers journal article supplement (doi:10.3389/fpls.2022.1025162), 2022-11-07

1 **Table S1.** Soil basic biochemical properties under nitrogen and water addition conditions.

|                                                                             | CK             | CN             | CW             | CWN             |
|-----------------------------------------------------------------------------|----------------|----------------|----------------|-----------------|
| SOM (g kg <sup>-1</sup> )                                                   | 46.65±1.51 b   | 98.66±20.53 a  | 46.17±10.60 b  | 64.07±4.87 ab   |
| TN (g kg <sup>-1</sup> )                                                    | 1.06±0.19 a    | 1.27±0.05 a    | 0.99±0.15 a    | 1.31±0.06 a     |
| TP (g kg <sup>-1</sup> )                                                    | 0.36±0.06 a    | 0.40±0.04 a    | 0.33±0.05 a    | 0.44±0.04 a     |
| AN (mg kg <sup>-1</sup> )                                                   | 124.71±23.13 b | 193.77±18.81 a | 125.27±23.06 b | 177.53±15.31 ab |
| AP (mg kg <sup>-1</sup> )                                                   | 25.14±3.50 a   | 25.84±0.69 a   | 22.78±3.94 a   | 29.64±0.66 a    |
| pH value                                                                    | 4.40±0.12 ab   | 4.14±0.07 b    | 4.60±0.08 a    | 4.19±0.06 b     |
| Urease<br>(mg NH <sub>3</sub> -N g <sup>-1</sup> soil d <sup>-1</sup> )     | 26.79±3.46 a   | 36.52±2.97 a   | 26.69±3.57 a   | 33.02±1.60 a    |
| Sucrase<br>(mg Glucose g <sup>-1</sup> soil d <sup>-1</sup> )               | 214.71±28.51 a | 263.50±9.38 a  | 210.26±26.30 a | 250.26±9.31 a   |
| Nitrate reductase<br>(mg NO <sub>2</sub> g <sup>-1</sup> ·d <sup>-1</sup> ) | 8.46±1.39 a    | 10.52±1.06 a   | 7.98±1.62 a    | 11.07±0.98 a    |
| MBC (mg kg <sup>-1</sup> )                                                  | 357.49±25.27 a | 416.89±16.19 a | 357.45±22.28 a | 390.85±12.07 a  |
| MBN (mg kg <sup>-1</sup> )                                                  | 59.10±3.45 a   | 63.06±2.38 a   | 58.19±4.43 a   | 64.60±2.09 a    |

2 In the same row, different lowercase letters mean significant differences under four treatments according to  
3 ANOVA with LSD tests ( $P < 0.05$ ). CK, control treatment; CN, canopy N addition; CW, canopy water increase;  
4 CWN, canopy water and N addition. SOM, soil organic matter; TN, soil total nitrogen; TP, soil total phosphorus;  
5 AN, available nitrogen; AP, available phosphorus; MBC, soil microbial biomass carbon; MBN, soil microbial  
6 biomass nitrogen.

7 **Figure S1.** Canopy nitrogen addition and water increase device, a triangular iron  
8 tower with a height of 35 m, was built in the center of each circular quadrat.

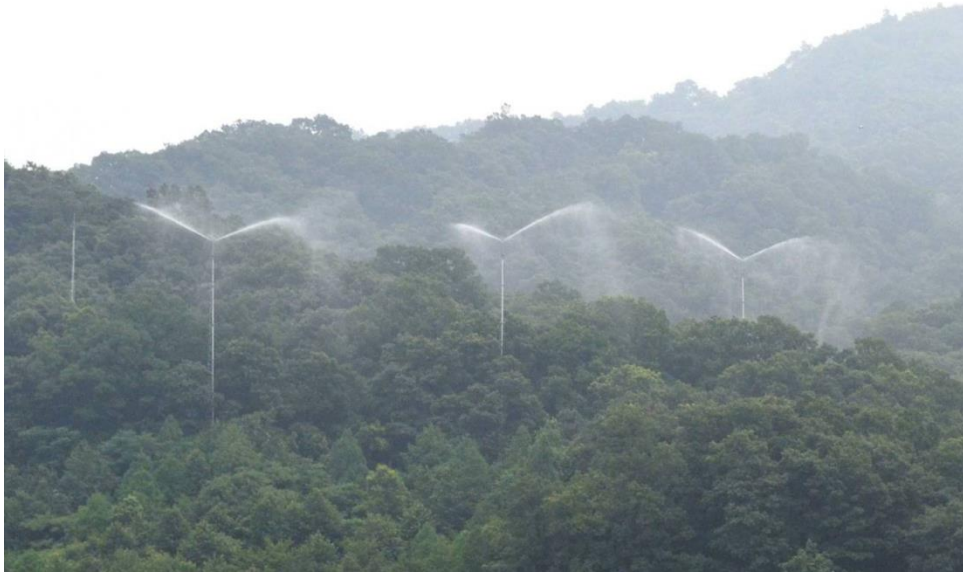

**Figure S2.** The PCA based on physiological traits of *Q. variabilis* under N and water addition conditions. CK, white circle; CN, white inverse triangle; CW, white diamond; CWN, white square. Chl a, chlorophyll a; Chl b, chlorophyll b; SLA, specific leaf area; NSCs, non-structural carbohydrates.

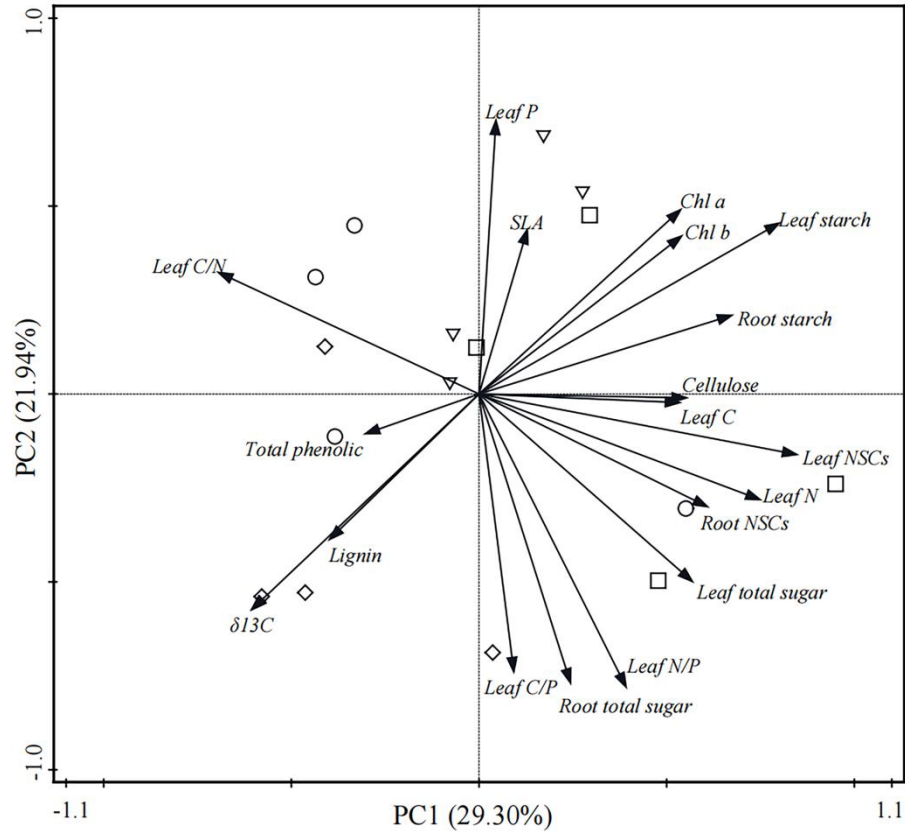

16 **Figure S3.** The PCA based on physiological traits of *L. formosana* under N and water  
 17 addition conditions. CK, black circle; CN, black inverse triangle; CW, black diamond;  
 18 CWN, black square. Chl a, chlorophyll a; Chl b, chlorophyll b; SLA, specific leaf area;  
 19 NSCs, non-structural carbohydrates.

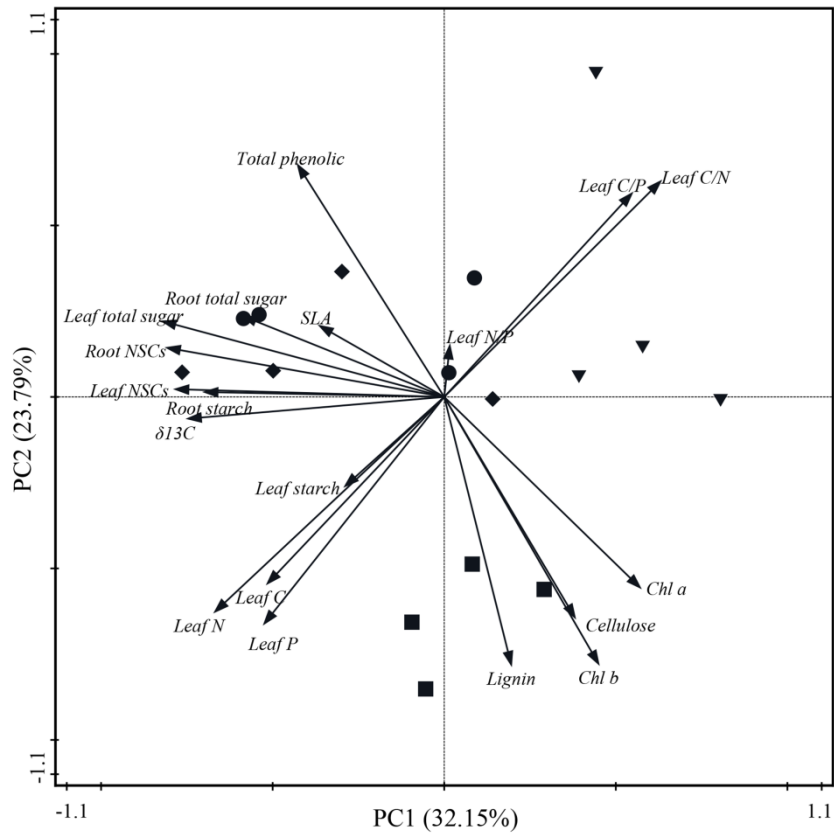

Supplement: Data_Sheet_1.PDF [file Data_Sheet_1.PDF]
